# Supplementary material for: Identification of SLC1A5 as a Novel Candidate Oncogene for Glioma and Its Involvement in the LGG Immune Microenvironment
Source: Research Square preprint supplement (doi:10.21203/rs.3.rs-355956/v1), 2021-04-30
Supplement: Supplementary file 1 [file ef9185d2bb5694963ebb5c7e.docx]

| Immunoinhibitors | | | Immunostimulators | | |
| --- | --- | --- | --- | --- | --- |
| Gene | rho | *P*-value | Gene | rho | *P*-value |
| **CD96** | 0.374 | 2.20E-16 | **C10orf54** | 0.615 | 2.20E-16 |
| **CSF1R** | 0.774 | 2.20E-16 | **CD276** | 0.523 | 2.20E-16 |
| **HAVCR2** | 0.83 | 2.20E-16 | **CD40** | 0.578 | 2.20E-16 |
| **IDO1** | 0.385 | 2.20E-16 | **CD48** | 0.42 | 2.20E-16 |
| **IL10** | 0.551 | 2.20E-16 | **CD86** | 0.824 | 2.20E-16 |
| **IL10RB** | 0.55 | 2.20E-16 | **CXCR4** | 0.562 | 2.20E-16 |
| **LGALS9** | 0.797 | 2.20E-16 | **ICOSLG** | 0.464 | 2.20E-16 |
| **PDCD1** | 0.5 | 2.20E-16 | **IL6** | 0.43 | 2.20E-16 |
| **PDCD1LG2** | 0.701 | 2.20E-16 | **IL6R** | 0.459 | 2.20E-16 |
| **PVRL2** | 0.4 | 2.20E-16 | **MICB** | 0.605 | 2.20E-16 |
| **TGFB1** | 0.813 | 2.20E-16 | **TMEM173** | 0.626 | 2.20E-16 |
| **TGFBR1** | 0.518 | 2.20E-16 | **TMIGD2** | 0.367 | 2.20E-16 |
| **CD274** | 0.343 | 5.48E-16 | **TNFRSF14** | 0.383 | 2.20E-16 |
| **LAG3** | 0.268 | 4.13E-10 | **TNFRSF8** | 0.515 | 2.20E-16 |
| **CD244** | 0.124 | 0.00415 | **TNFSF13** | 0.481 | 2.20E-16 |
| **CD160** | -0.092 | 0.0335 | **TNFSF13B** | 0.329 | 9.96E-15 |
| ADORA2A | -0.069 | 0.114 | **ENTPD1** | 0.316 | 1.31E-13 |
| TIGIT | 0.066 | 1.30E-01 | **CXCL12** | 0.308 | 5.39E-13 |
| KDR | -0.05 | 2.50E-01 | **TNFRSF13C** | 0.272 | 2.40E-10 |
| VTCN1 | -0.014 | 7.42E-01 | **IL2RA** | 0.261 | 1.23E-09 |
|  |  |  | **TNFSF18** | 0.248 | 8.49E-09 |
|  |  |  | **CD28** | 0.234 | 5.72E-08 |
|  |  |  | **ULBP1** | 0.213 | 7.53E-07 |
|  |  |  | **TNFRSF4** | 0.167 | 0.00011 |
|  |  |  | **TNFRSF25** | 0.167 | 0.000112 |
|  |  |  | **TNFSF9** | -0.161 | 0.000201 |
|  |  |  | **NT5E** | -0.149 | 0.000596 |
|  |  |  | KLRK1 | -0.063 | 0.144 |
|  |  |  | CD27 | 0.059 | 0.173 |
|  |  |  | TNFSF4 | 0.045 | 0.297 |
|  |  |  | PVR | 0.021 | 0.63 |

**Table S1.** The correlation between SLC1A5 expression and immunomodulators in LGG through spearman’s correlation analysis.
